# Supplementary material for: Computer-aided interpretation of chest radiography reveals the spectrum of tuberculosis in rural South Africa
Source: bioRxiv or medRxiv preprint supplement (doi:10.1101/2020.09.04.20188045), 2021-05-17
Supplement: Supplementary file [file 2020.09.04.20188045-1.pdf]

## Supplements

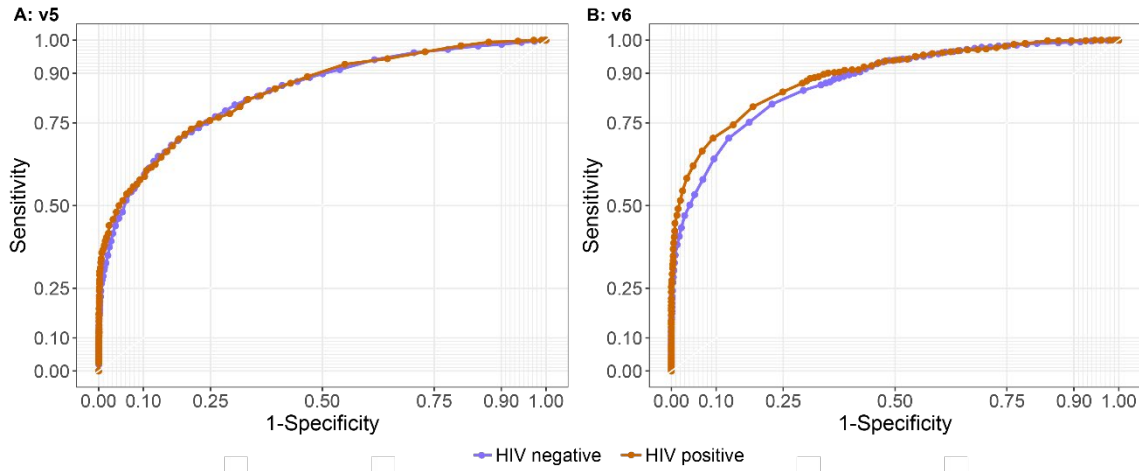

**Figure S1:** Receiver operating curve analysis of CAD4TB v5 and v6 to triage participants for sputum testing, stratified by HIV status. A) CAD4TB v5 B) CAD4TB v6 scores stratified by HIV status.

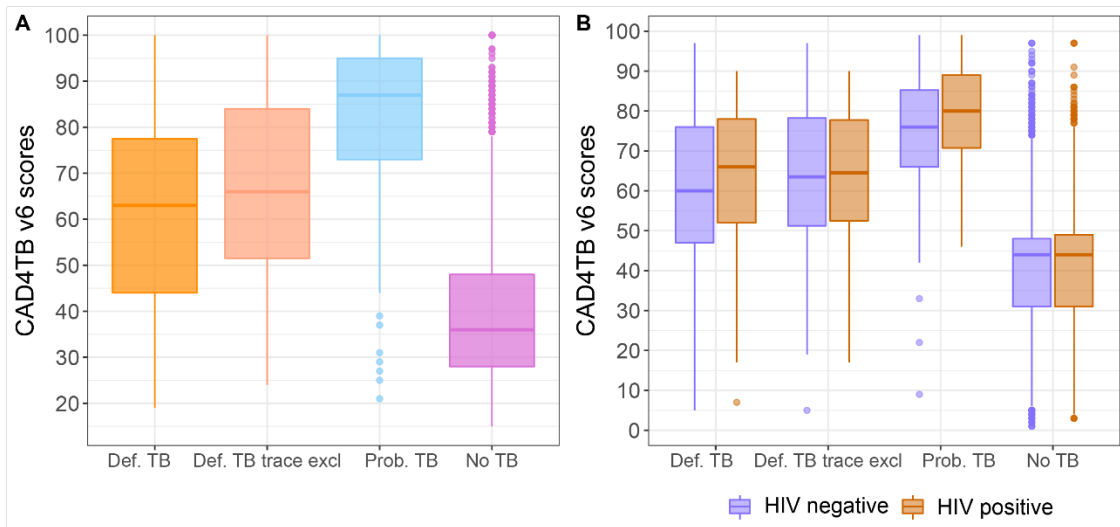

**Figure S2:** CAD4TB v6 scores between different gold standard groups of microbiological and/or radiological evidence for active TB. Patients were grouped by into A: M+R+, B: M+ R-, C: M-/OR+, D: M-/OR-. Horizontal lines mark the median and the 25-75% quartile. A) shows all participants, B) shows the same, stratified by HIV status.

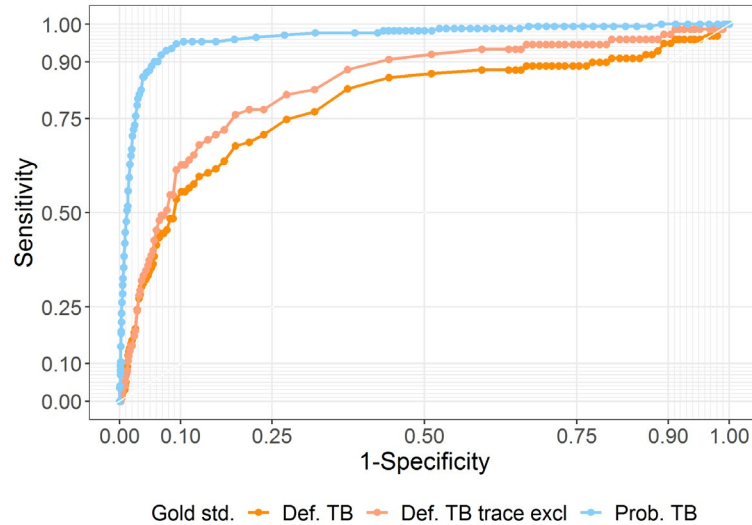

**Figure S3: Receiver operating curve of CAD4TBv6 scores compared to diagnostic microbiological and/or radiological evidence.** Positive TB was defined as either definite TB with microbiological evidence (M+), definite TB excluding samples that only had a XpertUltra trace result, or probable TB with no microbiological evidence but radiological signs of TB (M-/0 R+).

**Table S1: Performance of CAD4TB v5 and v6 scores to identify abnormal lung fields compared to the radiologist.** Performance is given in sensitivity and specificity with 95% confidence interval (CI).

| threshold | v5 Sensitivity % (CI) | v6 Sensitivity % (CI) | v5 Specificity % (CI) | v6 Specificity % (CI) |
|-----------|-----------------------|-----------------------|-----------------------|-----------------------|
| 25        | 90.3 (88.9-91.6)      | 94.7 (93.6-95.6)      | 48.2 (47.1-49.3)      | 44.6 (43.5-45.7)      |
| 30        | 82.9 (81.2-84.5)      | 93.2 (92.0-94.3)      | 63.7 (62.6-64.8)      | 52.4 (51.3-53.5)      |
| 35        | 75.5 (73.6-77.4)      | 90.3 (88.9-91.6)      | 75.4 (74.4-76.3)      | 59.1 (58-60.2)        |
| 40        | 67.8 (65.7-69.9)      | 88.3 (86.8-89.7)      | 83.3 (82.5-84.1)      | 64.8 (63.8-65.9)      |
| 50        | 53.1 (50.9-55.4)      | 55.1 (52.9-57.3)      | 93.3 (92.7-93.8)      | 95.3 (94.8-95.8)      |
| 60        | 32.9 (30.9-35)        | 29.7 (27.7-31.8)      | 98.8 (98.6-99.1)      | 99.6 (99.5-99.8)      |
| 70        | 19.4 (17.7-21.2)      | 17 (15.4-18.8)        | 99.8 (99.7-99.9)      | 100 (99.9-100)        |
| 80        | 11.4 (10-12.9)        | 8.2 (7.1-9.5)         | 99.9 (99.8-100)       | 100 (100-100)         |

**Table S2: Area under the receiver operating curves (AUC) from CAD4TBv5 and v6 compared to diagnostic microbiological and/or radiological evidence.** Positive TB was defined as either definite TB with microbiological evidence (M+), definite TB excluding M+ samples that only had a XpertUltra trace result, or probable TB with no microbiological evidence but radiological signs of TB (M-/0 R+).

| Gold standard                   | v5 AUC (CI)      | v6 AUC (CI)      |
|---------------------------------|------------------|------------------|
| Definite TB                     | 0.78 (0.73-0.83) | 0.79 (0.73-0.84) |
| Definite TB trace only excluded | 0.82 (0.77-0.87) | 0.84 (0.79-0.89) |
| Probable TB                     | 0.96 (0.95-0.98) | 0.96 (0.95-0.98) |

**Table S3: Performance of CAD4TBv5 scores compared to diagnostic microbiological and/or radiological evidence.** Positive TB was defined as either definite TB with microbiological evidence (M+), definite TB excluding M+ samples that only had a XpertUltra trace result, or probable TB with no microbiological evidence but radiological signs of TB (M-/0 R+). Performance is given as sensitivity, specificity, positive predictive value (PPV) and negative predictive value (NPV) in % with 95% confidence intervals (CI).

| Gold standard       | threshold | Sensitivity % (CI) | Specificity % (CI) | PPV % (CI)       | NPV % (CI)       |
|---------------------|-----------|--------------------|--------------------|------------------|------------------|
| Definite TB         | 25        | 96.0 (90.9-98.9)   | 8.0 (7.3-8.8)      | 2.1 (1.7-2.5)    | 99.0 (97.4-99.7) |
| Definite TB         | 50        | 69.7 (59.6-78.5)   | 74.5 (73.3-75.8)   | 5.3 (4.1-6.6)    | 99.2 (98.8-99.4) |
| Definite TB         | 60        | 55.6 (45.2-65.5)   | 87.9 (87.8-88.8)   | 8.6 (6.5-11.0)   | 99.0 (98.6-99.3) |
| Definite TB         | 65        | 48.5 (38.3-58.7)   | 91.1 (90.3-91.9)   | 10 (7.5-13.0)    | 98.9 (98.5-99.2) |
| Definite TB         | 70        | 40.4 (30.7-50.7)   | 93.5 (92.8-94.2)   | 11.3 (8.2-15.0)  | 98.7 (98.4-99.0) |
| Def. TB trace excl. | 25        | 97.3 (90.7-99.7)   | 8.0 (7.3-8.8)      | 1.6 (1.3-2)      | 99.5 (98.2-99.9) |
| Def. TB trace excl. | 50        | 77.3 (66.2-86.2)   | 74.5 (73.3-75.8)   | 4.5 (3.4-5.7)    | 99.5 (99.3-99.7) |
| Def. TB trace excl. | 60        | 62.7 (50.7-73.6)   | 87.9 (87.8-88.8)   | 7.4 (5.5-9.7)    | 99.4 (99.1-99.6) |
| Def. TB trace excl. | 65        | 53.3 (41.4-64.9)   | 91.1 (90.3-91.9)   | 8.5 (6.1-11.4)   | 99.2 (98.9-99.5) |
| Def. TB trace excl. | 70        | 44 (32.5-55.9)     | 93.5 (92.8-94.2)   | 9.5 (6.6-13.1)   | 99.1 (98.8-99.3) |
| Probable TB         | 25        | 99.4 (96.8-100)    | 41.1 (40.2-42.1)   | 2.9 (2.5-3.4)    | 100 (99.9-100)   |
| Probable TB         | 50        | 93.6 (88.8-96.8)   | 85.2 (84.5-85.9)   | 10.1 (8.6-11.7)  | 99.9 (99.8-99.9) |
| Probable TB         | 60        | 90.1 (84.6-94.1)   | 93.9 (93.4-94.4)   | 20.6 (17.8-23.7) | 99.8 (99.7-99.9) |
| Probable TB         | 70        | 79.7 (72.9-85.4)   | 97.3 (96.9-97.6)   | 34.2 (29.5-39)   | 99.6 (99.5-99.7) |

**Table S4: Performance of CAD4TBv6 scores compared to microbiological and radiological TB findings.** Positive TB was defined as either definite TB with microbiological evidence (M+), definite TB excluding M+ samples that only had a XpertUltra trace result, or probable TB with no microbiological evidence but radiological signs of TB (M-/0 R+). Performance is given as sensitivity, specificity, positive predictive value (PPV) and negative predictive value (NPV) in % with 95% confidence intervals (CI).

| Gold standard       | threshold | Sensitivity      | Specificity      | PPV              | NPV              |
|---------------------|-----------|------------------|------------------|------------------|------------------|
| Definite TB         | 25        | 90.9 (83.4-95.8) | 16.9 (15.9-18)   | 2.2 (1.8-2.7)    | 98.9 (98.9-99.5) |
| Definite TB         | 50        | 70.7 (60.7-79.4) | 76.4 (75.1-77.5) | 5.7 (4.5-7.2)    | 99.2 (98.9-99.5) |
| Definite TB         | 60        | 55.6 (45.2-65.5) | 89.9 (89.9-90.7) | 10.1 (7.7-12.9)  | 99 (98.7-99.3)   |
| Definite TB         | 65        | 44.4 (34.5-54.8) | 92.8 (92.9-93.5) | 11.1 (8.2-14.7)  | 98.8 (98.4-99.1) |
| Definite TB         | 70        | 36.4 (26.9-46.6) | 94.6 (93.9-95.2) | 12.0 (8.5-16.2)  | 98.7 (98.3-99)   |
| Def. TB trace excl. | 25        | 96.0 (88.8-99.2) | 16.9 (15.9-18)   | 1.7 (1.4-2.2)    | 99.6 (98.9-99.9) |
| Def. TB trace excl. | 50        | 77.3 (66.2-86.2) | 76.4 (75.1-77.5) | 4.8 (3.7-6.1)    | 99.5 (99.3-99.7) |
| Def. TB trace excl. | 60        | 62.7 (50.7-73.6) | 89.9 (89.9-90.7) | 8.7 (6.5-11.4)   | 99.4 (99.1-99.6) |
| Def. TB trace excl. | 65        | 49.3 (37.6-61.1) | 92.8 (92.9-93.5) | 9.5 (6.8-12.9)   | 99.2 (98.9-99.4) |
| Def. TB trace excl. | 70        | 40.0 (28.9-52)   | 94.6 (93.9-95.2) | 10.2 (7.1-14.2)  | 99 (98.7-99.3)   |
| Probable TB         | 25        | 98.8 (95.9-99.9) | 37.3 (36.4-38.3) | 2.7 (2.3-3.1)    | 99.9 (99.8-100)  |
| Probable TB         | 50        | 95.3 (91-98)     | 86.6 (85.9-87.2) | 11.1 (9.6-12.8)  | 99.9 (99.8-100)  |
| Probable TB         | 60        | 87.8 (81.9-92.3) | 95.2 (94.7-95.6) | 24.2 (20.9-27.8) | 99.8 (99.7-99.9) |
| Probable TB         | 65        | 81.4 (74.8-86.9) | 96.8 (96.4-97.1) | 30.9 (26.7-35.4) | 99.7 (99.5-99.8) |
| Probable TB         | 70        | 72.1 (64.8-78.7) | 97.8 (97.4-98)   | 36.3 (31.2-41.6) | 99.5 (99.3-99.6) |

**Table S5: P-values of comparing the diagnostic performance of CAD4TB to gold standards measured in area under the curve (AUC) between HIV-positive and negative individuals.** Gold standards were defined as either definite TB with microbiological evidence (M+), definite TB excluding M+ samples that only had a XpertUltra trace result, or probable TB with no microbiological evidence but radiological signs of TB (M-/0 R+). CAD4TB scores from version 5 (v5) and 6 (v6) were compared against these gold standards.

| Gold standard       | CAD4TBv5 | CAD4TBv6 |
|---------------------|----------|----------|
| Def. TB             | 0.42     | 0.32     |
| Def. TB trace excl. | 0.96     | 0.85     |
| Prob.TB             | 0.30     | 0.16     |

**Vukuzazi Team: Staff who significantly contributed to the implementation and conduct of Vukuzazi.**

\* Denotes team members who were closely involved with the design, implementation and oversight of Vukuzazi.

| Name                      | Role                                  |
|---------------------------|---------------------------------------|
| *Deenan Pillay            | Principal Investigator (2017-2019)    |
| *Willem Hanekom           | Principal Investigator (2019-present) |
| *Emily Wong               | Co-Principal Investigator             |
| *Mark Siedner             | Co-Principal Investigator             |
| *Olivier Koole            | Co-Principal Investigator (2017-2019) |
| *Thumbi Ndung'u           | Co-investigator                       |
| *Thandeka Khoza           | Co-investigator (2019-present)        |
| *Kobus Herbst             | Co-investigator                       |
| *Kathy Baisley            | Co-investigator                       |
| *Janet Seeley             | Co-investigator                       |
| *Alison Grant             | Co-investigator                       |
| *Resign Gunda             | Programme Manager                     |
| *Ashmika Surujdeen        | Study Coordinator                     |
| *Theresa Smit             | Head: Diagnostic Research             |
| *Dickman Gareta           | Head: Research Data Management        |
| *Day Munatsi              | Head: Research Data Systems           |
| *Ngcebo Mhlongo           | Study Physician                       |
| *Sanah Bucibo             | Lead Nurse                            |
| *Tshwaraganang Modise     | Research Data Manager                 |
| *Stephen Olivier          | Statistician                          |
| *Gregory Ording-Jespersen | Laboratory Data Supervisor            |
| *Innocentia Mpofana       | Diagnostic Laboratory Manager         |
| *Jaco Dreyer              | Senior Research Data Manager          |
| *Siyabonga Nxumalo        | Research Data Manager                 |
| *Khadija Khan             | Biorepository Manager                 |
| *Zizile Sikhosana         | Somkhele Laboratory Supervisor        |
| *Sashen Moodley           | Microbiology Laboratory Supervisor    |
| *Hollis Shen              | Head: Exploratory Research Division   |
| Kennedy Nyamande          | Pulmonology Consultant                |
| Mosa Suleman              | Pulmonology Consultant                |
| Jaikrishna Kalideen       | Radiologist                           |
| Ramesh Jackpersad         | Radiologist                           |

|                            |                                        |
|----------------------------|----------------------------------------|
| Kgaugelo Moropane          | Radiographer                           |
| Boitsholo Mfolo            | Radiographer                           |
| Khabonina Malomane         | Radiographer                           |
| Hlolisile Khumalo          | Nursing Manager                        |
| Nompilo Buthelezi          | Training Coordinator                   |
| Nozipho Mbonambi           | Professional Nurse                     |
| Hloniphile Ngubane         | Professional Nurse                     |
| Thokozani Simelane         | Professional Nurse                     |
| Khanyisani Buthelezi       | Professional Nurse                     |
| Sphiwe Ntuli               | Professional Nurse                     |
| Nombuyiselo Zondi          | Professional Nurse                     |
| Siboniso Nene              | Professional Nurse                     |
| Bongumenzi Ndlovu          | Enrolled Nurse                         |
| Talente Ntimbane           | Enrolled Nurse                         |
| Mbali Mbuyisa              | Enrolled Nurse                         |
| Xolani Mkhize              | Enrolled Nurse                         |
| Melusi Sibiya              | Enrolled Nurse                         |
| Ntombiyenkosi Ntombela     | Enrolled Nurse                         |
| Mandisi Dlamini            | Enrolled Nurse                         |
| Hlobisile Chonco           | Enrolled Nurse                         |
| Hlengiwe Dlamini           | Enrolled Nurse                         |
| Doctar Mlambo              | Enrolled Nurse                         |
| Nonhlanhla Mzimela         | Enrolled Nurse                         |
| Zinhle Buthelezi           | Enrolled Nurse                         |
| Zinhle Mthembu             | Enrolled Nurse                         |
| Thokozani Bhengu           | Enrolled Nurse                         |
| Sandile Mthembu            | Enrolled Nurse                         |
| Phumelele Mthethwa         | Enrolled Nurse                         |
| Zamashandu Mbatha          | Enrolled Nurse                         |
| Welcome Petros Mthembu     | Enrolled Nurse                         |
| Anele Mkhwanazi            | Clinical Research Assistant Supervisor |
| Mandlakayise Zikhali       | Clinical Research Assistant Supervisor |
| Phakamani Mkhwanazi        | Clinical Research Assistant            |
| Ntombiyenhlanhla Mkhwanazi | Clinical Research Assistant            |
| Rose Myeni                 | Clinical Research Assistant            |
| Fezeka Mfeka               | Clinical Research Assistant            |
| Hlobisile Gumede           | Clinical Research Assistant            |
| Nonceba Mfeka              | Clinical Research Assistant            |
| Ayanda Zungu               | Clinical Research Assistant            |
| Hlobisile Gumede           | Clinical Research Assistant            |
| Nonhlanhla Mfekayi         | Clinical Research Assistant            |
| Smangaliso Zulu            | Clinical Research Assistant            |
| Mzamo Buthelezi            | Clinical Research Assistant            |
| Senzeni Mkhwanazi          | Clinical Research Assistant            |
| Mlungisi Dube              | Clinical Research Assistant            |
| Philippa Mathews           | Clinical Governance                    |
| Siphephelo Dlamini         | AHRI Nursing Manager                   |
| Hosea Kambonde             | IT Systems Developer                   |
| Lindani Mthembu            | Information Technology Assistant       |

|                        |                                               |
|------------------------|-----------------------------------------------|
| Seneme Mchunu          | Information Technology Assistant              |
| Sibahle Gumbi          | Research Admin Assistant                      |
| Tumi Madolo            | Research Data Manager                         |
| Thengokwakhe Nkosi     | Driver                                        |
| Sibusiso Mkhwanazi     | Driver                                        |
| Sibusiso Nsibande      | Driver                                        |
| Mpumelelo Steto        | Driver                                        |
| Sibusiso Mhlongo       | Driver                                        |
| Velile Vellem          | Driver                                        |
| Pfarelo Tshivase       | Driver                                        |
| Jabu Kwinda            | Driver                                        |
| Bongani Magwaza        | General Worker                                |
| Siyabonga Nsibande     | General Worker                                |
| Skhumbuzo Mthombeni    | General Worker                                |
| Sphiwe Clement Mthembu | General Worker                                |
| Antony Rapulana        | Laboratory Technologist                       |
| Jade Cousins           | Laboratory Technologist                       |
| Thabile Zondi          | Laboratory Technologist                       |
| Nagavelli Padayachi    | Laboratory Technologist                       |
| Freddy Mabetlela       | Laboratory Technologist                       |
| Simphiwe Ntshangase    | Laboratory Technician/LIMS Administrator      |
| Nomfundo Luthuli       | Laboratory Technician                         |
| Sithembile Ngcobo      | Laboratory Technologist                       |
| Kayleen Brien          | Laboratory Technologist                       |
| Sizwe Ndlela           | Laboratory Technician                         |
| Nomfundo Ngema         | Laboratory Technician                         |
| Nokukhanya Ntshakala   | Laboratory Technician                         |
| Anupa Singh            | Laboratory Technician                         |
| Rochelle Singh         | Laboratory Technician                         |
| Logan Pillay           | Laboratory Technician                         |
| Kandaseelan Chetty     | Laboratory Technician                         |
| Ashentha Govender      | Laboratory Technician                         |
| Pamela Ramkalawon      | Laboratory Research Technician                |
| Nondumiso Mabaso       | Laboratory Intern                             |
| Kimeshree Perumal      | Laboratory Intern                             |
| Senamile Makhari       | Biorepository Laboratory Technician           |
| Nondumiso Khuluse      | Biorepository Laboratory Technician           |
| Nondumiso Zitha        | Biorepository Research Assistant              |
| Hlengiwe Khathi        | Biorepository Research Assistant              |
| Mbuti Mofokeng         | Clinical Specimen Driver/Laboratory Assistant |
| Nomathamsanqa Majazi   | Public Engagement                             |
| Nceba Gqaleni          | Public Engagement                             |
| Hannah Keal            | Communications                                |
| Phumla Ngcobo          | Communications                                |
| Costa Criticos         | Operational Oversight                         |
| Raynold Zondo          | Operational Oversight                         |
| Dilip Kalyan           | Operational Oversight                         |
| Clive Mavimbela        | Operational Oversight                         |

|                 |               |
|-----------------|---------------|
| Anand Ramnanan  | Procurement   |
| Sashin Harilall | Grants Office |
